# Supplementary material for: The respiratory microbiome is linked to the severity of RSV infections and the persistence of symptoms in children
Source: PubMed Central journal article supplement (PMC11722103; doi:10.1016/j.xcrm.2024.101836), 2024-12-05
Supplement: mmc1.pdf [file mmc1.pdf]

**Cell Reports Medicine, Volume 5**

**Supplemental information**

**The respiratory microbiome is linked  
to the severity of RSV infections  
and the persistence of symptoms in children**

**Maartje Kristensen, Wouter A.A. de Steenhuijsen Piters, Joanne Wildenbeest, Marlies A. van Houten, Roy P. Zuurbier, Raiza Hasrat, Kayleigh Arp, Mei Ling J.N. Chu, Marie Billard, Terho Heikkinen, Steve Cunningham, Matthew Snape, Simon B. Drysdale, Ryan S. Thwaites, Federico Martinon-Torres, Andrew J. Pollard, Peter J.M. Openshaw, Jeroen Aerssen, Justyna Binkowska, Louis Bont, Debby Bogaert, and REspiratory Syncytial virus Consortium in EUrope (RESCEU) investigators**

**Cell Reports Medicine, Volume 5**

**Supplemental information**

**The respiratory microbiome is linked  
to the severity of RSV infections  
and the persistence of symptoms in children**

**Maartje Kristensen, Wouter A.A. de Steenhuijsen Pipers, Joanne Wildenbeest, Marlies A. van Houten, Roy P. Zuurbier, Raiza Hasrat, Kayleigh Arp, Mei Ling J.N. Chu, Marie Billard, Terho Heikkinen, Steve Cunningham, Matthew Snape, Simon B. Drysdale, Ryan S. Thwaites, Federico Martinon-Torres, Andrew J. Pollard, Peter J.M. Openshaw, Jeroen Aerssen, Justyna Binkowska, Louis Bont, Debby Bogaert, and REspiratory Syncytial virus Consortium in EUrope (RESCEU) investigators**

## Supplemental information

| Variable                                 | Overall, N = 773 <sup>1</sup> | No RSV infection in the first year of life, N = 576 <sup>1</sup> | RSV infection in the first year of life, N = 197 <sup>1</sup> | p-value <sup>2</sup> |
|------------------------------------------|-------------------------------|------------------------------------------------------------------|---------------------------------------------------------------|----------------------|
| Year of birth                            |                               |                                                                  |                                                               | 0.004 <sup>a</sup>   |
| 2017                                     | 56/773 (7.2%)                 | 41/576 (7.1%)                                                    | 15/197 (7.6%)                                                 |                      |
| 2018                                     | 336/773 (43%)                 | 270/576 (47%)                                                    | 66/197 (34%)                                                  |                      |
| 2019                                     | 381/773 (49%)                 | 265/576 (46%)                                                    | 116/197 (59%)                                                 |                      |
| Season of birth                          |                               |                                                                  |                                                               | 0.459 <sup>a</sup>   |
| Autumn                                   | 186/773 (24%)                 | 146/576 (25%)                                                    | 40/197 (20%)                                                  |                      |
| Spring                                   | 198/773 (26%)                 | 148/576 (26%)                                                    | 50/197 (25%)                                                  |                      |
| Summer                                   | 225/773 (29%)                 | 165/576 (29%)                                                    | 60/197 (30%)                                                  |                      |
| Winter                                   | 164/773 (21%)                 | 117/576 (20%)                                                    | 47/197 (24%)                                                  |                      |
| Gestational age (weeks)                  |                               |                                                                  |                                                               | 0.942 <sup>a</sup>   |
| 37+0-37+6                                | 67/760 (8.8%)                 | 52/568 (9.2%)                                                    | 15/192 (7.8%)                                                 |                      |
| 38+0-38+6                                | 98/760 (13%)                  | 74/568 (13%)                                                     | 24/192 (12%)                                                  |                      |
| 39+0-39+6                                | 240/760 (32%)                 | 178/568 (31%)                                                    | 62/192 (32%)                                                  |                      |
| >=40+0                                   | 355/760 (47%)                 | 264/568 (46%)                                                    | 91/192 (47%)                                                  |                      |
| Vaginal delivery                         | 212/773 (27%)                 | 156/576 (27%)                                                    | 56/197 (28%)                                                  | 0.715 <sup>a</sup>   |
| Birth weight                             | 3,490 (3,158, 3,780)          | 3,470 (3,122, 3,789)                                             | 3,516 (3,286, 3,748)                                          | 0.084 <sup>b</sup>   |
| Female sex                               | 380/773 (49%)                 | 290/576 (50%)                                                    | 90/197 (46%)                                                  | 0.259 <sup>a</sup>   |
| Apgar score (1 minute)                   | 9.00 (9.00, 9.00)             | 9.00 (9.00, 9.00)                                                | 9.00 (9.00, 9.00)                                             | 0.147 <sup>b</sup>   |
| Apgar score (5 minutes)                  | 10.00 (9.00, 10.00)           | 10.00 (9.00, 10.00)                                              | 10.00 (9.00, 10.00)                                           | 0.872 <sup>b</sup>   |
| Apgar score (10 minutes)                 | 10.00 (9.00, 10.00)           | 10.00 (9.00, 10.00)                                              | 10.00 (9.00, 10.00)                                           | 0.310 <sup>b</sup>   |
| Postnatal infection                      | 18/770 (2.3%)                 | 15/574 (2.6%)                                                    | 3/196 (1.5%)                                                  | 0.584 <sup>c</sup>   |
| Postnatal antibiotic treatment           | 13/18 (72%)                   | 12/15 (80%)                                                      | 1/3 (33%)                                                     | 0.172 <sup>c</sup>   |
| Asphyxia                                 | 3/769 (0.4%)                  | 2/573 (0.3%)                                                     | 1/196 (0.5%)                                                  | >0.999 <sup>c</sup>  |
| Hospitalisation                          | 78/773 (10%)                  | 54/576 (9.4%)                                                    | 24/197 (12%)                                                  | 0.259 <sup>a</sup>   |
| Hospital length of stay                  | 2.00 (2.00, 3.00)             | 2.00 (2.00, 3.00)                                                | 2.00 (2.00, 3.00)                                             | 0.699 <sup>b</sup>   |
| Any respiratory support                  | 8/766 (1.0%)                  | 5/571 (0.9%)                                                     | 3/195 (1.5%)                                                  | 0.427 <sup>c</sup>   |
| Mother planning to breastfeed            | 680/771 (88%)                 | 506/574 (88%)                                                    | 174/197 (88%)                                                 | 0.949 <sup>a</sup>   |
| Intention to register to daycare         | 368/764 (48%)                 | 259/568 (46%)                                                    | 109/196 (56%)                                                 | 0.016 <sup>a</sup>   |
| Maternal smoking during pregnancy        | 40/771 (5.2%)                 | 34/574 (5.9%)                                                    | 6/197 (3.0%)                                                  | 0.116 <sup>a</sup>   |
| Household smoking                        | 101/770 (13%)                 | 81/573 (14%)                                                     | 20/197 (10%)                                                  | 0.153 <sup>a</sup>   |
| Pets inside the home                     | 319/771 (41%)                 | 253/574 (44%)                                                    | 66/197 (34%)                                                  | 0.009 <sup>a</sup>   |
| Any family member with history of asthma | 206/768 (27%)                 | 146/572 (26%)                                                    | 60/196 (31%)                                                  | 0.165 <sup>a</sup>   |
| Number of RTI episodes                   | 1.00 (0.00, 3.00)             | 1.00 (0.00, 2.00)                                                | 3.00 (2.00, 4.00)                                             | <0.001 <sup>b</sup>  |
| Age at first RSV infection               | 170 (108, 260)                | N/A                                                              | 170 (108, 260)                                                |                      |
| Medically attended RSV infection         | 100/185 (54%)                 | N/A                                                              | 100/185 (54%)                                                 |                      |
| Severity of first RSV infection          |                               |                                                                  |                                                               |                      |
| mild                                     | 173/190 (91%)                 | N/A                                                              | 173/190 (91%)                                                 |                      |
| moderate                                 | 17/190 (8.9%)                 | N/A                                                              | 17/190 (8.9%)                                                 |                      |

**Table S1. Baseline characteristics of early-life samples, stratified by whether or not the child would develop an RSV infection in the first year of life.**

<sup>1</sup>n/N (%); Median (IQR)

<sup>2</sup>To assess statistical significance between groups (subjects who will develop an RSV infection over the first year of life and those who do not) we used a <sup>a</sup>Pearson's Chi-squared test; <sup>b</sup>Wilcoxon rank sum test or a <sup>c</sup>Fisher's exact test.

| Variable                                      | Healthy controls, N = 52 <sup>1</sup> | RSV, N = 374 <sup>1</sup> | p-value <sup>2</sup> |
|-----------------------------------------------|---------------------------------------|---------------------------|----------------------|
| Study                                         |                                       |                           | <0.001 <sup>a</sup>  |
| Birth cohort                                  | 0/52 (0%)                             | 117/374 (31%)             |                      |
| Case-control                                  | 52/52 (100%)                          | 257/374 (69%)             |                      |
| Age (days)                                    | 222 (112, 297)                        | 94 (48, 200)              | <0.001 <sup>b</sup>  |
| Female sex                                    | 15/52 (29%)                           | 174/373 (47%)             | 0.016 <sup>a</sup>   |
| Year (visit)                                  |                                       |                           | <0.001 <sup>c</sup>  |
| 2017                                          | 0/52 (0%)                             | 22/254 (8.7%)             |                      |
| 2018                                          | 11/52 (21%)                           | 106/254 (42%)             |                      |
| 2019                                          | 41/52 (79%)                           | 100/254 (39%)             |                      |
| 2020                                          | 0/52 (0%)                             | 26/254 (10%)              |                      |
| Season (visit)                                |                                       |                           | <0.001 <sup>c</sup>  |
| Autumn                                        | 21/52 (40%)                           | 163/254 (64%)             |                      |
| Spring                                        | 11/52 (21%)                           | 1/254 (0.4%)              |                      |
| Summer                                        | 19/52 (37%)                           | 0/254 (0%)                |                      |
| Winter                                        | 1/52 (1.9%)                           | 90/254 (35%)              |                      |
| Site                                          |                                       |                           | 0.063 <sup>c</sup>   |
| Spain                                         | 6/52 (12%)                            | 27/347 (7.8%)             |                      |
| The Netherlands                               | 25/52 (48%)                           | 181/347 (52%)             |                      |
| UK (London)                                   | 3/52 (5.8%)                           | 3/347 (0.9%)              |                      |
| UK (Oxford)                                   | 18/52 (35%)                           | 136/347 (39%)             |                      |
| Duration onset of symptoms to sampling (days) | N/A                                   | 4.00 (3.00, 5.00)         |                      |
| ReSViNET score                                | N/A                                   | 6.0 (4.0, 10.0)           |                      |
| Fever (>38.5°C)                               | 0/52 (0%)                             | 317/374 (85%)             | <0.001 <sup>a</sup>  |
| Any medical attendance                        | 0/52 (0%)                             | 301/370 (81%)             | <0.001 <sup>a</sup>  |
| Hospitalisation                               | 0/52 (0%)                             | 192/367 (52%)             | <0.001 <sup>a</sup>  |
| PICU admission                                | 0/52 (0%)                             | 61/241 (25%)              | <0.001 <sup>a</sup>  |
| Any comorbidities                             | 29/51 (57%)                           | 40/257 (16%)              | <0.001 <sup>a</sup>  |

**Table S2. Baseline characteristics of healthy controls compared to RSV cases.**

<sup>1</sup>n/N (%); Median (IQR)

<sup>2</sup>To assess statistical significance between groups (healthy controls compared to RSV cases) we used a

<sup>a</sup>Pearson's Chi-squared test; <sup>b</sup>Wilcoxon rank sum test or a <sup>c</sup>Fisher's exact test.

| Variable                                      | Mild RSV, N = 218 <sup>1</sup> | Moderate RSV, N = 106 <sup>1</sup> | Severe RSV, N = 47 <sup>1</sup> | p-value <sup>2</sup> |
|-----------------------------------------------|--------------------------------|------------------------------------|---------------------------------|----------------------|
| Study                                         |                                |                                    |                                 | <0.001 <sup>a</sup>  |
| Birth cohort                                  | 106/218 (49%)                  | 10/106 (9.4%)                      | 1/47 (2.1%)                     |                      |
| Case-control                                  | 112/218 (51%)                  | 96/106 (91%)                       | 46/47 (98%)                     |                      |
| Age (days)                                    | 158 (62, 247)                  | 87 (48, 184)                       | 48 (28, 96)                     | <0.001 <sup>b</sup>  |
| Female sex                                    | 106/217 (49%)                  | 49/106 (46%)                       | 18/47 (38%)                     | 0.418 <sup>a</sup>   |
| Year (visit)                                  |                                |                                    |                                 | 0.738 <sup>c</sup>   |
| 2017                                          | 8/112 (7.1%)                   | 9/95 (9.5%)                        | 5/44 (11%)                      |                      |
| 2018                                          | 45/112 (40%)                   | 40/95 (42%)                        | 20/44 (45%)                     |                      |
| 2019                                          | 50/112 (45%)                   | 34/95 (36%)                        | 15/44 (34%)                     |                      |
| 2020                                          | 9/112 (8.0%)                   | 12/95 (13%)                        | 4/44 (9.1%)                     |                      |
| Season (visit)                                |                                |                                    |                                 | 0.031 <sup>c</sup>   |
| Autumn                                        | 82/112 (73%)                   | 55/95 (58%)                        | 24/44 (55%)                     |                      |
| Spring                                        | 0/112 (0%)                     | 1/95 (1.1%)                        | 0/44 (0%)                       |                      |
| Winter                                        | 30/112 (27%)                   | 39/95 (41%)                        | 20/44 (45%)                     |                      |
| Site                                          |                                |                                    |                                 | 0.007 <sup>c</sup>   |
| Spain                                         | 9/194 (4.6%)                   | 15/104 (14%)                       | 2/46 (4.3%)                     |                      |
| The Netherlands                               | 112/194 (58%)                  | 42/104 (40%)                       | 27/46 (59%)                     |                      |
| UK (London)                                   | 2/194 (1.0%)                   | 0/104 (0%)                         | 1/46 (2.2%)                     |                      |
| UK (Oxford)                                   | 71/194 (37%)                   | 47/104 (45%)                       | 16/46 (35%)                     |                      |
| Duration onset of symptoms to sampling (days) | 3.00 (3.00, 5.00)              | 4.00 (3.00, 5.00)                  | 4.00 (3.00, 5.00)               | 0.072 <sup>b</sup>   |
| ReSViNET score                                | 4.0 (3.0, 6.0)                 | 10.0 (8.2, 11.8)                   | 16.0 (14.5, 17.0)               | <0.001 <sup>b</sup>  |
| Fever (>38.5°C)                               | 200/218 (92%)                  | 80/106 (75%)                       | 36/47 (77%)                     | <0.001 <sup>a</sup>  |
| Any medical attendance                        | 152/214 (71%)                  | 101/106 (95%)                      | 47/47 (100%)                    | <0.001 <sup>a</sup>  |
| Hospitalisation                               | 53/214 (25%)                   | 93/105 (89%)                       | 45/45 (100%)                    | <0.001 <sup>a</sup>  |
| PICU admission                                | 4/101 (4.0%)                   | 23/93 (25%)                        | 34/46 (74%)                     | <0.001 <sup>a</sup>  |
| Any comorbidities                             | 8/112 (7.1%)                   | 19/96 (20%)                        | 13/46 (28%)                     | 0.002 <sup>a</sup>   |

**Table S3. Baseline characteristics of RSV cases, stratified by severity.**

<sup>1</sup>n/N (%); Median (IQR)

<sup>2</sup>To assess statistical significance between groups (mild, moderate and severe RSV) we used a <sup>a</sup>Pearson's Chi-squared test; <sup>b</sup>Kruskal-Wallis rank sum test or a <sup>c</sup>Fisher's exact test.

| <b>Study</b> | <b>Group</b>        | <b>Mean</b> | <b>SD</b> | <b>Min</b> | <b>p25</b> | <b>median</b> | <b>p75</b> | <b>Max</b> |
|--------------|---------------------|-------------|-----------|------------|------------|---------------|------------|------------|
| Birth cohort | Baseline            | 31,141      | 15,553    | 5,008      | 19,579     | 30,777        | 41,453     | 76,940     |
|              | RSV                 | 35,680      | 7,913     | 12,298     | 30,640     | 36,063        | 39,904     | 63,236     |
|              | RSV<br>(conv)       | 37,500      | 7,948     | 18,534     | 32,579     | 36,136        | 40,296     | 63,245     |
| Case-control | Healthy<br>controls | 27,218      | 5,120     | 12,091     | 24,793     | 26,542        | 30,150     | 40,964     |
|              | RSV                 | 27,207      | 8,100     | 5,383      | 22,060     | 26,952        | 30,957     | 57,902     |
|              | RSV<br>(conv)       | 27,509      | 7,150     | 13,426     | 22,106     | 26,621        | 31,917     | 46,772     |
| Overall      | Overall             | 30,586      | 12,620    | 5,008      | 22,580     | 29,890        | 37,878     | 76,940     |

**Table S4. Sequencing depth stratified by study and study group.** Number of reads (after quality control/decontamination) stratified by study and study groups. 'Overall' represents the sequencing depth across the total dataset. Mean, standard deviation (SD), minimum (Min; p0), maximum (Max; p100), Median (p50) and 25<sup>th</sup> (p25) and 75<sup>th</sup> (p75) percentiles are shown.

**Figure S1**

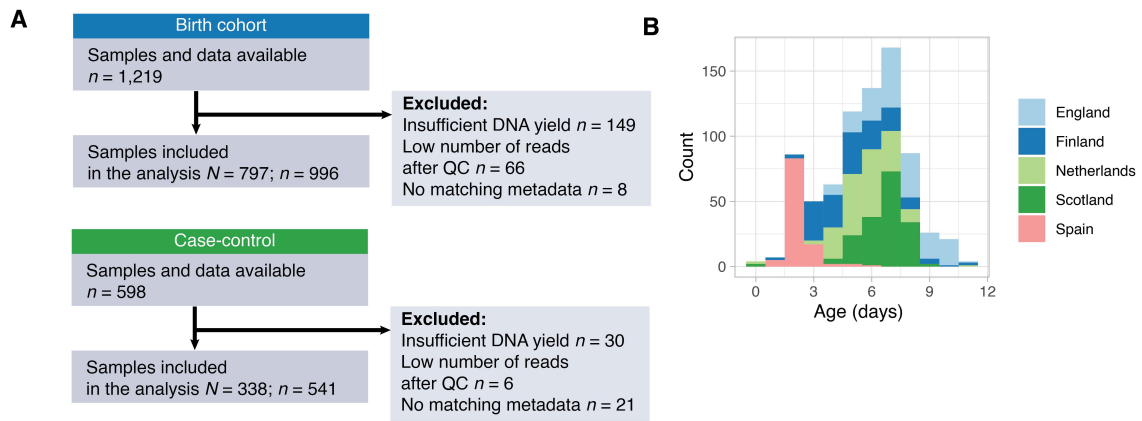

**Figure S1. Sample inclusion and age at baseline sample collection.** (A) Flow chart indicating the number of participants ( $N$ ) and samples ( $n$ ) at each step during laboratory processing and data preparation. (B) Histogram showing the age at sample collection of baseline samples per study site.

**Figure S2**

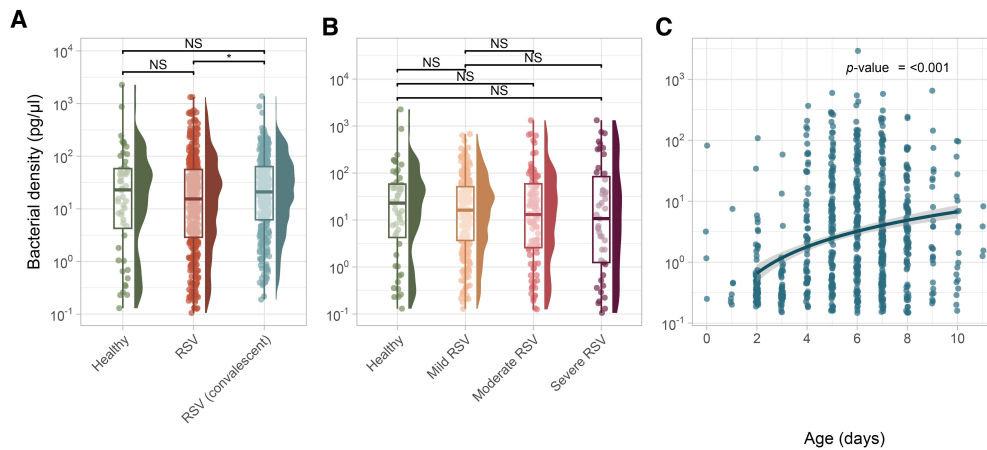

**Figure S2. Bacterial density between groups and across age.** (A) Bacterial density in healthy controls, during and after RSV infection and (B) in healthy controls ( $n = 52$ ), mild (RESViNet-score 0-7;  $n = 218$ ), moderate (8-13;  $n = 106$ ) and severe RSV infection (14-20;  $n = 47$ ). Statistical significance was assessed using linear mixed effects models with  $\log_{10}$ -transformed bacterial density as outcome, age, sex and health status (healthy controls, RSV or RSV convalescent; A) or RSV severity (healthy, mild, moderate and severe RSV; B) as fixed effects and study site as random effect. Subject ID was additionally included for comparisons between RSV and RSV convalescence. Box plots represent the 25<sup>th</sup> and 75<sup>th</sup> percentiles (lower and upper boundaries of boxes, respectively), the median (middle horizontal line), and measurements that fall within 1.5 times the interquartile range (IQR; distance between 25<sup>th</sup> and 75<sup>th</sup> percentiles; whiskers). (C) Bacterial density for baseline samples over age. Statistical significance was assessed using a linear mixed effects model, including  $\log_{10}$ -transformed bacterial density as outcome, the natural log of age, season of birth, sex and presence of siblings as fixed effects and study site as random effect. Asterisks denote statistical significance (NS, not significant [ $p > 0.05$ ]; \*,  $p \leq 0.05$ ; \*\*,  $p \leq 0.01$ ; \*\*\*,  $p \leq 0.001$ ).



Figure S3

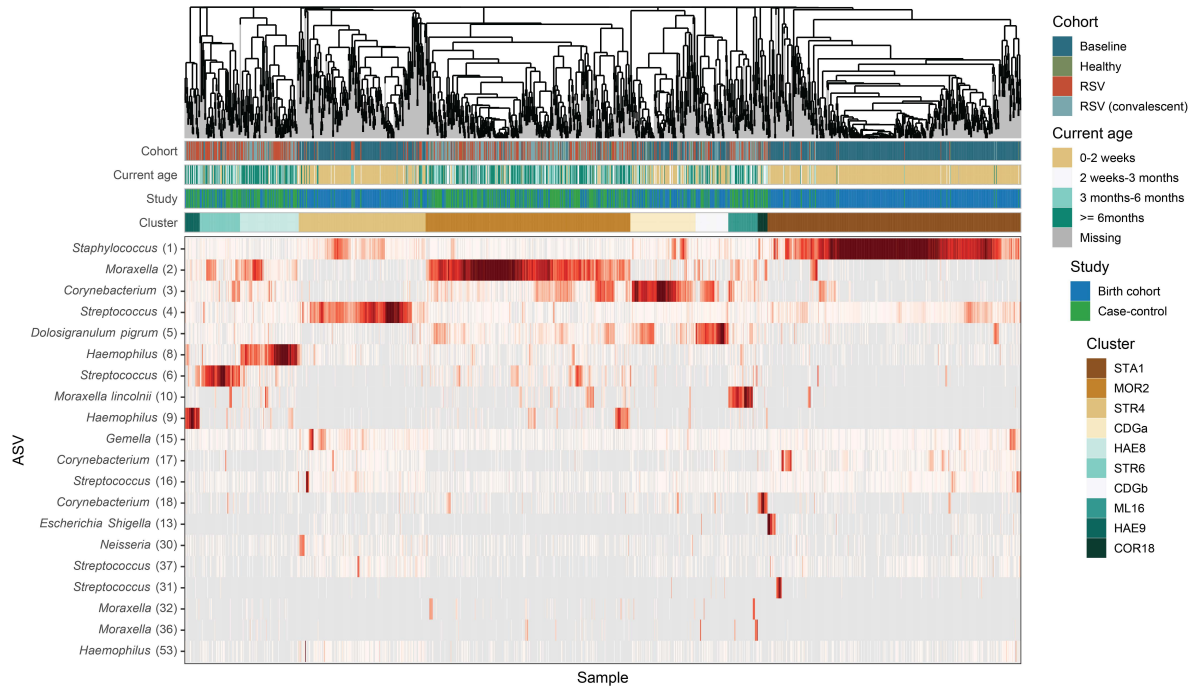

**Figure S3. Dendrogram visualizing a complete linkage hierarchical clustering of samples based on the Bray-Curtis dissimilarity matrix.** The length of the branches of the tree structure corresponds with the similarities between samples ( $n = 1,537$ ). Adjacent to the branch ends information on 1) cohort [baseline, healthy controls, RSV and RSV convalescent], 2) current age, 3) study [birth cohort or case-control] and 4) cluster membership is depicted. Based on Calinski- Harabasz and Silhouette-indices we found an optimum of 10 clusters. These included clusters characterized by *Staphylococcus* (1) (STA1;  $n = 466$ ), *Moraxella* (2) (MOR2;  $n = 376$ ), *Streptococcus* (4) (STR4;  $n = 233$ ), *Corynebacterium* (3)/*Dolosigranulum pigrum* (5) (CDGa and CDGb;  $n = 180$ ), *Haemophilus* (8) (HAE8;  $n = 108$ ), *Streptococcus* (6) (STR6;  $n = 74$ ), *Moraxella lincolnii* (16) (ML16;  $n = 54$ ), *Haemophilus* (9) (HAE9;  $n = 28$ ) or *Corynebacterium* (18) (COR18;  $n = 18$ ). A heatmap shows the relative abundance of the 20 highest-ranked ASVs based on mean relative abundance across all samples. Repeated samples from individuals were included in this clustering analysis to optimize cluster identification and increase comparability across time points.

**Figure S4**

| Group(s)                        | Model     | Dependent variable     | Independent variables                                                       | Figure |
|---------------------------------|-----------|------------------------|-----------------------------------------------------------------------------|--------|
| HC RSVc / RSV HC                | Imer      | $\alpha$ -diversity    | health status, age, sex, read count*, study site                            | 2A     |
| HC RSVc / RSV RSVc              | Imer      | $\alpha$ -diversity    | health status, age, sex, read count*, time RSV/RSVc, study site, subject ID | 2A     |
| HC RSVc / RSV HC                | Imer      | density <sup>†</sup>   | health status, age, sex, study site                                         | S2A    |
| HC RSVc / RSV RSVc              | Imer      | density <sup>†</sup>   | health status, age, sex, study site, subject ID                             | S2A    |
| HC RSVc / RSV HC                | PERMANOVA | $\beta$ -diversity     | health status, age, sex, study site                                         | 2B     |
| HC RSVc / RSV RSVc              | PERMANOVA | $\beta$ -diversity     | health status, age, sex, time RSV/RSVc, study site                          | 2B     |
| HC RSVc / RSV RSVc              | PERMANOVA | $\beta$ -diversity     | health status, age, subject ID                                              | 2B     |
| HC RSVc / RSV HC                | Imer      | health status          | cluster, age, sex, study site                                               | 2D     |
| HC RSVc / RSV HC                | MaAsLin2  | ASV/genus <sup>‡</sup> | health status, age, sex, study site                                         | 2E-F   |
| HC mild / HC mod / HC sev       | Imer      | $\alpha$ -diversity    | severity, age, sex, read count*, study site                                 | 3A     |
| HC mild / HC mod / HC sev       | Imer      | density <sup>†</sup>   | severity, age, sex, study site                                              | S2B    |
| HC mild / HC mod / HC sev       | PERMANOVA | $\beta$ -diversity     | severity, age, sex, study site                                              | 3B     |
| RSVc mild / RSVc mod / RSVc sev | Imer      | stability              | severity, age, sex, time RSV/RSVc, study site                               | 3C     |
| HC mild / HC mod / HC sev       | Imer      | severity               | cluster, age, sex, study site                                               | 3D     |
| HC mild / HC mod / HC sev       | MaAsLin2  | ASV/genus <sup>‡</sup> | severity, age, sex, study site                                              | 3E-F   |
| HC mild / HC mod / HC sev       | MaAsLin2  | ASV/genus <sup>‡</sup> | severity, age, sex, time RSV/RSVc, abx, study site (within RSVc)            | 4A-B   |
| <symptoms>                      | MaAsLin2  | ASV/genus <sup>‡</sup> | symptom, age, sex, time RSV/RSVc, study site (within RSVc)                  | 4A-B   |
| baseline                        | Imer      | $\alpha$ -diversity    | age <sup>†</sup> , sex, read count*, birth season, siblings, study site     | 5A     |
| baseline                        | Imer      | density <sup>†</sup>   | age <sup>†</sup> , sex, birth season, siblings, study site                  | S2C    |
| baseline                        | PERMANOVA | $\beta$ -diversity     | age (cat), study site (+/- Spain)                                           | 5B     |
| baseline                        | PERMANOVA | $\beta$ -diversity     | study site, age (cat)                                                       | 5B     |
| baseline                        | PERMANOVA | $\beta$ -diversity     | birth season, age (cat), study site                                         | 5B     |
| baseline                        | PERMANOVA | $\beta$ -diversity     | birth mode, age (cat), study site                                           | 5B     |
| baseline                        | PERMANOVA | $\beta$ -diversity     | feeding, age (cat), study site                                              | 5B     |
| baseline                        | PERMANOVA | $\beta$ -diversity     | sex, age (cat), study site                                                  | 5B     |
| baseline                        | PERMANOVA | $\beta$ -diversity     | siblings, age (cat), study site                                             | 5B     |
| no RSV any RSV                  | Imer      | RSV y/n                | cluster, age, sex, birth season, siblings, study site                       | 5D     |
| no RSV any RSV                  | PERMANOVA | $\beta$ -diversity     | RSV y/n, age, sex, birth season, siblings, study site                       | 5D     |
| non-MA RSV MA RSV               | Imer      | MA RSV y/n             | cluster, age, sex, age RSV, birth season, siblings, study site              | 5D     |
| non-MA RSV MA RSV               | PERMANOVA | $\beta$ -diversity     | MA RSV y/n, age, sex, age RSV, birth season, siblings, study site           | 5D     |
| no RSV any RSV                  | rf        | RSV y/n                | ASV1, ASV2 ... ASV39, age RSV                                               | 5E-G   |
| non-MA RSV MA RSV               | rf        | MA RSV y/n             | ASV1, ASV2 ... ASV39, age RSV                                               | 5E-G   |

Variable of interest   Fixed effects   Optional effect   Random effects/blocked permutations

**Figure S4. Overview of statistical models.** Overview of all (multivariable) models included in either main text, (supplementary) figures or both. For each model, the type of model, dependent variables and independent variables (stratified by fixed effects or random effects) are indicated. Models were ran with and without ‘optional effects’. Linear or logistic mixed effects models (ImerTest::Imer or lme4::glmer, respectively) were applied for continuous or dichotomous dependent variables, respectively, including study site and/or subject ID as random effect throughout. Blocked permutations were applied in PERMANOVA-tests to account for study site and/or subject ID. \* scaled; † log<sub>10</sub>- or natural log-transformed; HC, healthy controls; RSVc, RSV convalescence; mod, moderate RSV infection; sev, severe RSV infection; age (cat), age categories; MA, medically attended; rf, random forest.
